# Supplementary material for: Achieving multicolor emission readout and tunable photoswitching via multiplexing of dual lanthanides in ferroelectric oxides
Source: Royal Society of Chemistry journal article supplement (doi:10.1039/c9tc00834a), 2019-01-01
Supplement: c9tc00834a1.pdf [file c9tc00834a1.pdf]

## Supporting information

# Achieving multicolor emission readout and tunable photoswitching via multiplexing of dual lanthanides in ferroelectric oxides

Haiqin Sun,<sup>a</sup> Xuefeng Li,<sup>a</sup> Yan Zhu,<sup>a</sup> Xusheng Wang,<sup>c</sup> Qiwei Zhang,<sup>a,b</sup> and Xihong Hao<sup>\*a,b</sup>

<sup>a</sup> Inner Mongolia Key Laboratory of Ferroelectric-related New Energy Materials and Devices, School of Materials and Metallurgy, Inner Mongolia University of Science and Technology, 7# Arerding Street, Kun District, Baotou 014010, China.

<sup>b</sup> Key Laboratory of Integrated Exploitation of Bayan Obo Multi-Metal Resources, Inner Mongolia University of Science and Technology, Baotou 014010, China.

<sup>c</sup> Functional Materials Research Laboratory, School of Materials Science and Engineering Tongji University, 4800 Caoyang Road, Shanghai 201804, China.

E-mail: a8082sz@imust.edu.cn (H.Q. Sun)

E-mail: xhhao@imust.edu.cn (X.H. Hao)

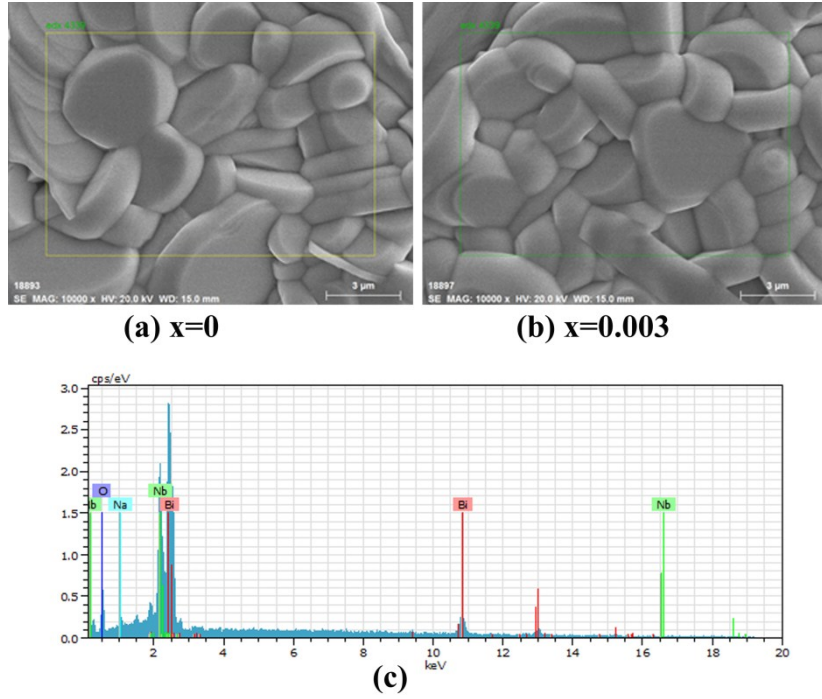

**Fig. S1** (a) and (b) SEM images of NBN:yPE ceramics ( $y=0, 0.003$ ), (c) EDS spectrum of pure NBN.

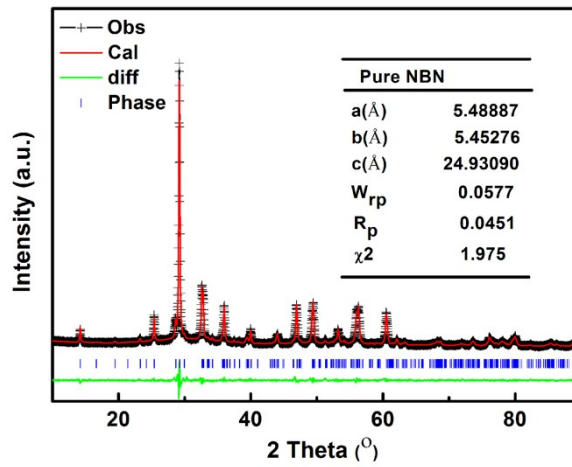

**Fig. S2** XRD Rietveld refinement of pure NBN and the fitted parameters.

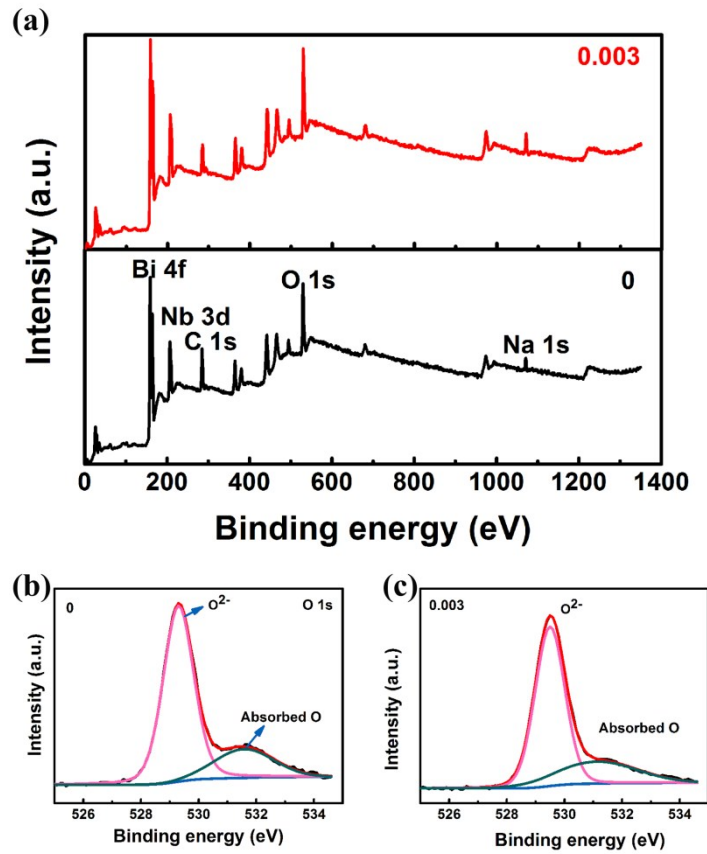

**Fig. S3** (a) XPS spectra of O 1s for NBN:yPE ceramics ( $y=0, 0.003$ ), (b) XPS spectra of O 1s for pure NBN, (c) XPS spectra of O 1s for the NBN:0.003PE ceramic.

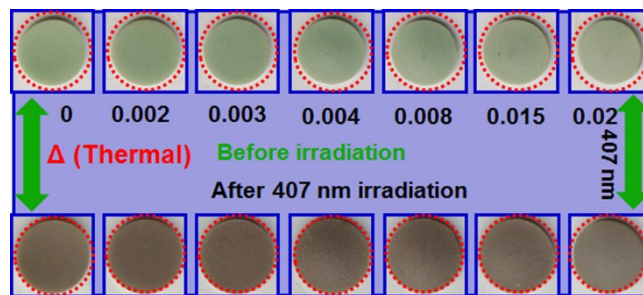

**Fig. S4** As-prepared ceramic images before and after 407 nm irradiation with different  $\text{Er}^{3+}$  concentrations.

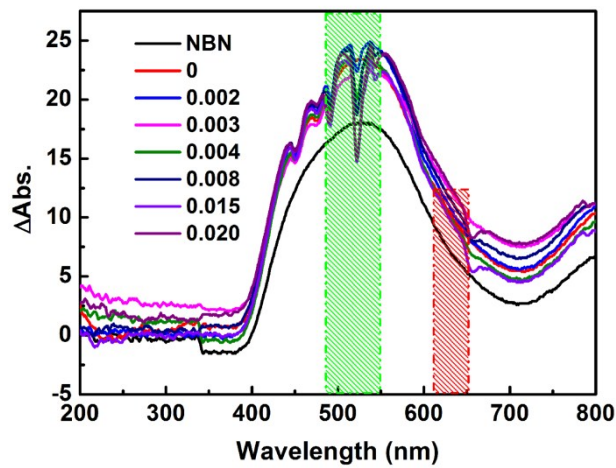

Fig. S5 The  $\Delta$ Abs. versus wavelength curves for NBN:yPE ceramics.

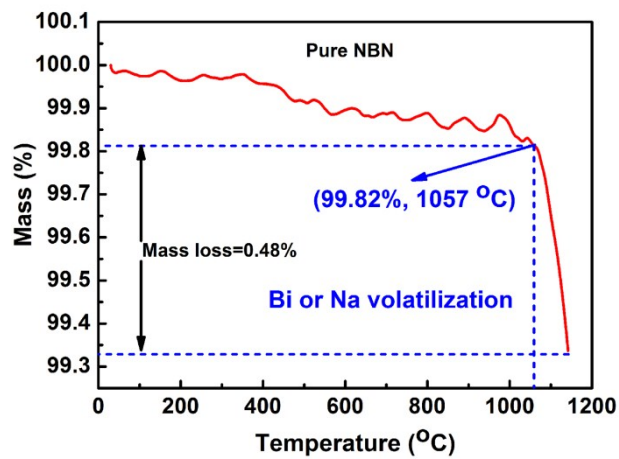

Fig. S6 The TG curve for pure NBN powders calcined at 900 °C for 4h.

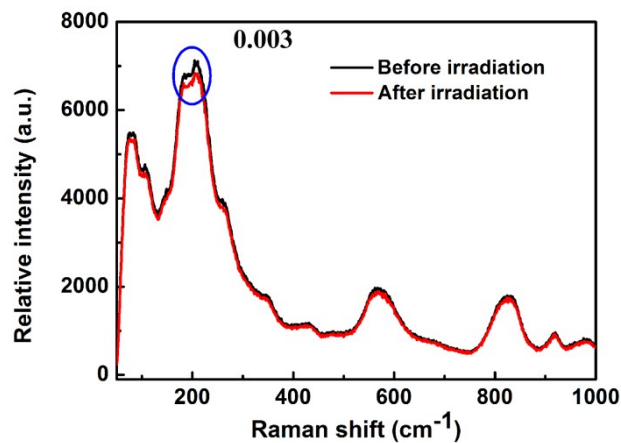

Fig. S7 Raman spectra of the NBN:0.003PE sample before and after 407 nm irradiation.

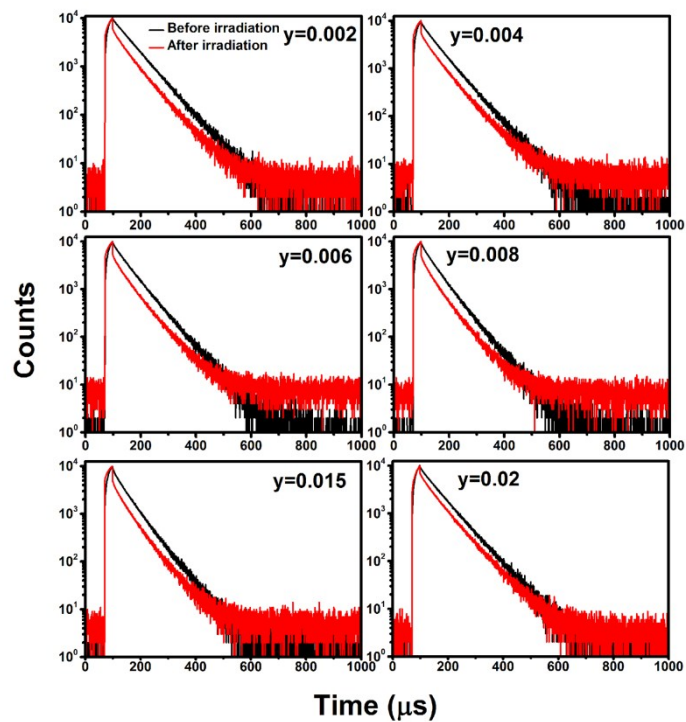

**Fig. S8** The change of luminescent lifetimes (monitored at 613 nm) of samples before and after irradiation.

**Table S1** Fitting parameters of the O 1s XPS spectra for pure NBN and NBN:0.003PE ceramics.

| Samples | Lattice O <sup>2-</sup> (eV) | Vacancy O (Vo) (eV) | O <sup>2-</sup> /Vo |
|---------|------------------------------|---------------------|---------------------|
| NBN     | 529.304                      | 531.571             | 3.4520              |
| 0.003   | 529.499                      | 531.127             | 2.7973              |

**Table S2** The average luminescent lifetimes ( $\tau_{ave}$ ) of samples before and after irradiation.

| Samples                           | 0.002 | 0.004 | 0.006 | 0.008 | 0.015 | 0.020 |
|-----------------------------------|-------|-------|-------|-------|-------|-------|
| Before ( $\tau_{ave}$ )( $\mu$ s) | 65.6  | 57.5  | 54.6  | 48.8  | 45.3  | 64.5  |
| After ( $\tau_{ave}$ )( $\mu$ s)  | 54.6  | 53.4  | 50.2  | 45.4  | 44.2  | 56.5  |
